# Supplementary material for: Controlling for genetic identity of varieties, pollen contamination and stigma receptivity is essential to characterize the self‐incompatibility system of Olea europaea L
Source: Evol Appl. 2017 Jun 29;10(9):860–6. doi: 10.1111/eva.12498 (PMC5680419; doi:10.1111/eva.12498)
Supplement: Supplementary file 1 [file EVA-10-860-s001.pdf]

Table S1. Genotype of the Oit46 Olive varieties of the Perugia collection (PER) (Italy) with 15 polymorphic SSR markers. The tree was tested for compatibility with G1 and G2 testers: 0 indicates incompatibility was observed, 1 indicates compatibility was observed. Each tree was assigned to G1 or G2 SI group. Assignment was repeated with different pairs of testers.

|                            |  |         |         |
|----------------------------|--|---------|---------|
| UDO36                      |  | 140     | 142     |
| UDO36                      |  | 140     | 142     |
| GAPU71B                    |  | 126     | 139     |
| GAPU71B                    |  | 126     | 139     |
| GAPU59                     |  | 210     | 210     |
| GAPU59                     |  | 210     | 210     |
| EMO90                      |  | 183     | 189     |
| EMO90                      |  | 183     | 189     |
| EMO03                      |  | 209     | 212     |
| EMO03                      |  | 209     | 212     |
| DCA18                      |  | 174     | 176     |
| DCA18                      |  | 174     | 176     |
| DCA15                      |  | 242     | 242     |
| DCA15                      |  | 242     | 242     |
| DCA14                      |  | 176     | 186     |
| DCA14                      |  | 176     | 186     |
| DCA11                      |  | 145     | 177     |
| DCA11                      |  | 145     | 177     |
| DCA09                      |  | 159     | 169     |
| DCA09                      |  | 159     | 169     |
| DCA08                      |  | 135     | 137     |
| DCA08                      |  | 135     | 137     |
| DCA05                      |  | 190     | 202     |
| DCA05                      |  | 190     | 202     |
| DCA04                      |  | 130     | 161     |
| DCA04                      |  | 130     | 161     |
| DCA03                      |  | 236     | 250     |
| DCA03                      |  | 236     | 250     |
| DCA01                      |  | 203     | 211     |
| DCA01                      |  | 203     | 211     |
| Gene pool                  |  | Central |         |
| Self Compatibility         |  | 0       | 0       |
| Self-Incompatibility       |  | 1       | 1       |
| repetitions of stigma test |  | 2       | 2       |
| SI Phenotype               |  | G2      | G2      |
| compatibility with G1+G2   |  | 0       | 0       |
| compatibility with G2      |  | 0       | 0       |
| compatibility with G1      |  | 1       | 1       |
| Reference DNA sample       |  | Oit46   | Oit46   |
| code                       |  | M-40    | M-40    |
| Position in collection /   |  | I-23-34 | I-23-34 |
| orchard                    |  | Oc1414  | Oc1414  |
| Collection / Orchard       |  | PER     | PER     |
|                            |  | OWGB    | OWGB    |
